# Supplementary material for: Characteristics of the Oxidative Status in Dairy Calves Fed at Different Milk Replacer Levels and Weaned at 14 Weeks of Age
Source: MDPI journal article supplement (doi:10.3390/antiox10020260), 2021-02-08
Supplement: s1 [file s1]

Supplementary Table 1. Health parameters of weekly health checks.

|                                               |                                                                                                                                                                                                             |
|-----------------------------------------------|-------------------------------------------------------------------------------------------------------------------------------------------------------------------------------------------------------------|
| Health score                                  | 1 = Completely healthy<br>2 = One health disturbance within one check and week<br>3 = Diseased and / or > 40°C rectal temperature (rectally)<br>4 > 39.5°C without any other symptoms / health disturbances |
| Health disturbances                           | 1 = Rectal temperature > 39.5°C<br>2 = Digestion<br>3 = Respiration<br>4 = Eye-related<br>5 = Navel                                                                                                         |
| Body posture                                  | 1 = lively, jumping around<br>2 = slightly subdued, standing<br>3 = subdued, chest position<br>4 = subdued, side position                                                                                   |
| Body temperature (rectal)                     | 1 ≤ 38.0°C<br>2 = 38.1 – 39.5°C<br>3 = 39.6 – 40.0°C<br>4 ≥ 40.0°C                                                                                                                                          |
| Navel inflammation                            | 1 = Yes, 2 = No                                                                                                                                                                                             |
| Faecal consistency                            | 1 = pasty<br>2 = thinly mushy<br>3 = soupy<br>4 = watery<br>5 = ruminant <i>faeces</i>                                                                                                                      |
| Abdominal rigidity                            | 1 = soft<br>2 = tense, hardened                                                                                                                                                                             |
| Apdominal spalrtter / ringing                 | 1 = negative on both sides<br>2 = positive on the left side<br>3 = positive on the right side                                                                                                               |
| Depth of <i>bulbus oculi</i> in <i>orbita</i> | 1 = 0 mm<br>2 = 1-2 mm<br>3 = 3-4 mm<br>4 ≥ 5 mm                                                                                                                                                            |
| Episcleral vessels filling                    | 1 = moderately injected<br>2 = slightly injected<br>3 = moderate injected<br>4 = highly injected                                                                                                            |
| Episcleral vessels sharpness                  | 1 = sharp<br>2 = blurred                                                                                                                                                                                    |
| Heart rate                                    | 1 = 80 - 110/min<br>2 = 111 - 140/min<br>3 ≥ 140/min<br>4 ≤ 80/min                                                                                                                                          |
| Colour mucosa (mouth)                         | 1 = pink<br>2 = pale pink<br>3 = cyanotic<br>4 = white                                                                                                                                                      |
| Respiratory frequency                         | 1 = 20 - 36/min<br>2 = 37 - 60/min                                                                                                                                                                          |

|                                |                                                    |
|--------------------------------|----------------------------------------------------|
|                                | 3 ≥ 60/min                                         |
| Dyspnoea (shortness of breath) | 1 = none<br>2 = slight<br>3 = moderate<br>4 = high |
| Nares blown                    | 1 = Yes, 2 = No                                    |
| Mouth breathing                | 1 = Yes, 2 = No                                    |
| Straight head-neck-posture     | 1 = Yes, 2 = No                                    |
